# Supplementary material for: Using Google Trends to Examine the Spatio-Temporal Incidence and Behavioral Patterns of Dengue Disease: A Case Study in Metropolitan Manila, Philippines
Source: PubMed Central journal article supplement (PMC6306840; doi:10.3390/tropicalmed3040118), 2018-11-11
Supplement: tropicalmed-03-00118-s001.pdf [file tropicalmed-03-00118-s001.pdf]

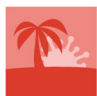

**Table S1.** Cross-correlation analysis ( $R^2$ ) of Dengue incidence and Google Dengue Trends.

| Lag Weeks   | GDT   |       |       |          | AdjGDT |       |       |          |
|-------------|-------|-------|-------|----------|--------|-------|-------|----------|
|             | DI    | LogDI | AdjDI | AdjLogDI | DI     | LogDI | AdjDI | AdjLogDI |
| Lag Week 0  | 0.164 | 0.156 | 0.558 | 0.332    | 0.438  | 0.356 | 0.280 | 0.221    |
| Lag Week 1  | 0.166 | 0.162 | 0.570 | 0.342    | 0.465  | 0.382 | 0.305 | 0.242    |
| Lag Week 2  | 0.152 | 0.153 | 0.537 | 0.331    | 0.458  | 0.385 | 0.305 | 0.245    |
| Lag Week 3  | 0.130 | 0.141 | 0.480 | 0.312    | 0.428  | 0.369 | 0.282 | 0.236    |
| Lag Week 4  | 0.106 | 0.125 | 0.428 | 0.290    | 0.383  | 0.340 | 0.252 | 0.218    |
| Lag Week 5  | 0.077 | 0.100 | 0.354 | 0.257    | 0.338  | 0.307 | 0.212 | 0.195    |
| Lag Week 6  | 0.051 | 0.075 | 0.283 | 0.215    | 0.299  | 0.282 | 0.177 | 0.178    |
| Lag Week 7  | 0.028 | 0.051 | 0.213 | 0.176    | 0.248  | 0.248 | 0.138 | 0.156    |
| Lag Week 8  | 0.012 | 0.032 | 0.164 | 0.139    | 0.188  | 0.203 | 0.098 | 0.127    |
| Lag Week 9  | 0.002 | 0.016 | 0.112 | 0.105    | 0.131  | 0.156 | 0.061 | 0.098    |
| Lag Week 10 | 0.001 | 0.004 | 0.065 | 0.068    | 0.082  | 0.110 | 0.030 | 0.067    |
| Lag Week 11 | 0.008 | 0.000 | 0.036 | 0.038    | 0.044  | 0.069 | 0.010 | 0.040    |
| Lag Week 12 | 0.023 | 0.004 | 0.014 | 0.019    | 0.017  | 0.038 | 0.001 | 0.020    |
| Lag Week 13 | 0.042 | 0.014 | 0.003 | 0.007    | 0.004  | 0.017 | 0.002 | 0.007    |
| Lag Week 14 | 0.065 | 0.028 | 0.000 | 0.002    | 0.000  | 0.005 | 0.010 | 0.002    |
| Lag Week 15 | 0.089 | 0.046 | 0.005 | 0.000    | 0.002  | 0.001 | 0.023 | 0.000    |
| Lag Week 16 | 0.109 | 0.061 | 0.010 | 0.002    | 0.009  | 0.000 | 0.035 | 0.001    |
| Lag Week 17 | 0.125 | 0.074 | 0.019 | 0.005    | 0.014  | 0.002 | 0.045 | 0.004    |
| Lag Week 18 | 0.144 | 0.091 | 0.032 | 0.009    | 0.019  | 0.003 | 0.058 | 0.005    |
| Lag Week 19 | 0.165 | 0.114 | 0.049 | 0.017    | 0.025  | 0.005 | 0.070 | 0.006    |
| Lag Week 20 | 0.180 | 0.133 | 0.061 | 0.026    | 0.028  | 0.007 | 0.075 | 0.007    |
| Lag Week 21 | 0.183 | 0.145 | 0.065 | 0.035    | 0.028  | 0.008 | 0.077 | 0.008    |
| Lag Week 22 | 0.197 | 0.168 | 0.080 | 0.048    | 0.034  | 0.012 | 0.088 | 0.011    |
| Lag Week 23 | 0.211 | 0.200 | 0.093 | 0.072    | 0.036  | 0.016 | 0.093 | 0.016    |
| Lag Week 24 | 0.214 | 0.219 | 0.096 | 0.090    | 0.036  | 0.018 | 0.094 | 0.019    |
| Lag Week 25 | 0.221 | 0.236 | 0.103 | 0.102    | 0.038  | 0.021 | 0.100 | 0.023    |

GDT = Google Dengue Trends; AdjGDT = Adjusted Google Dengue Trends; DI = Dengue Incidence; LogDI = Logarithm Transformed Dengue Incidence; AdjDI = Adjusted Dengue Incidence; AdjLogDI = Adjusted Logarithm Transformed Dengue Incidence.
